# Supplementary material
Source: PubMed Central journal article supplement (PMC2649408)

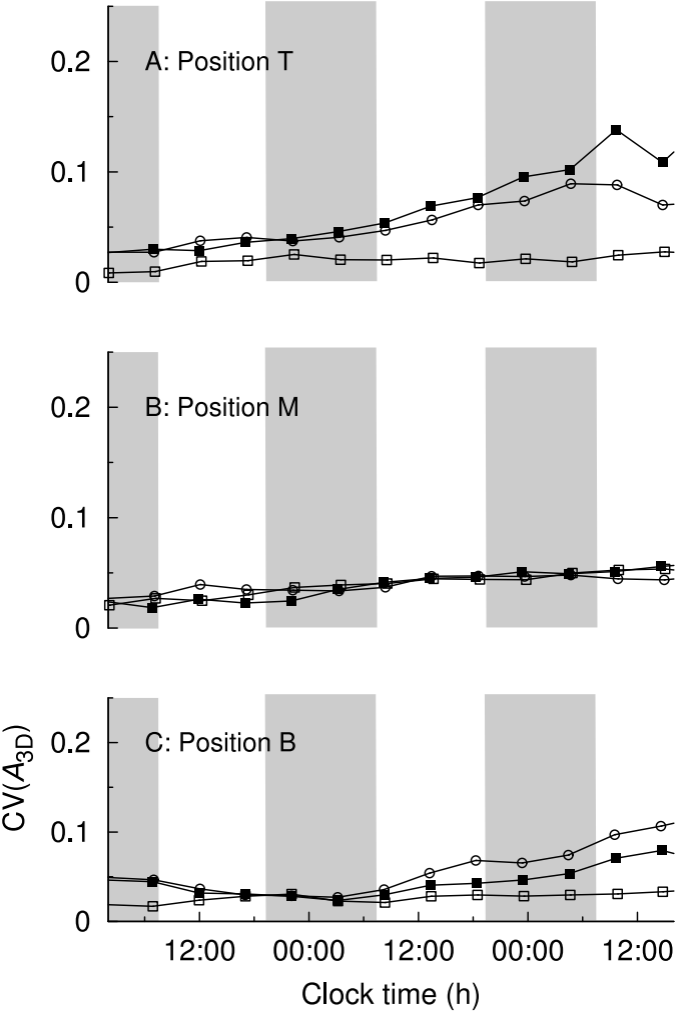

Supplement: pp.108.134486_1.pdf [file pp.108.134486_1.pdf]

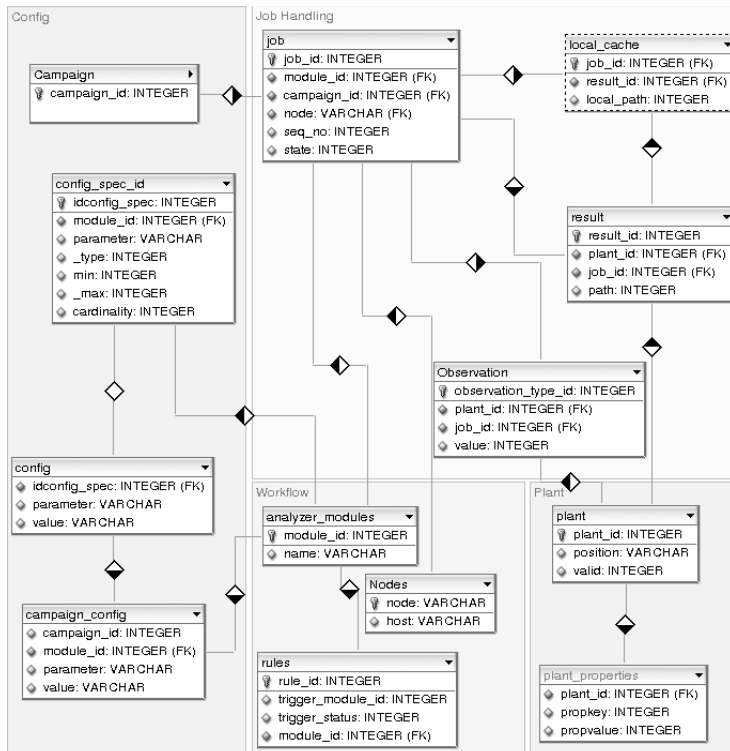

Supplement: pp.108.134486_3.pdf [file pp.108.134486_3.pdf]
